# Supplementary material
Source: HighWire-hosted journal article supplement (https://mct.aacrjournals.org/content/suppl/2006/01/30/4.10.1559)
Supplement: MCT_10-05_Wallqvist.pdf [file MCT_10-05_Wallqvist.pdf]

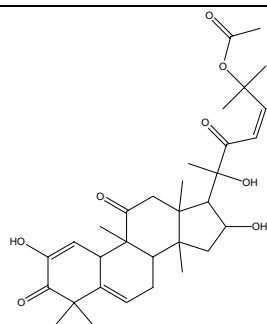

A. Cucurbitacins

|                  |        |     |       |             |    |       |
|------------------|--------|-----|-------|-------------|----|-------|
| <p>NSC94743</p>  | k11.12 | N11 | 0.383 | 0.009389081 | NH | ≥10mg |
| <p>NSC106399</p> | k11.12 | N11 | 0.451 | 0.000695808 | NH | ≥10mg |

Cucurbitacin E targets proliferating endothelia. Duncan M D; Duncan K L Surgical Service, Veterans Affairs Medical Center, Washington, D.C., USA Journal of surgical research (1997 Apr), 69(1), 55-60.

Comment: Targeting various stages of ploidy; related to actin, cytochalasin activities

**Possible Targets from SciFinder:**

- Actins 7
- Laccase 7
- Transcription factors 6
- Cyclooxygenase-2 3
- Steroid receptors 3
- Steroid receptors, 4-unsatd. oxo 3
- AKT kinase 2
- Cyclooxygenase-1 2
- Ecdysteroid receptors 2
- Extracellular signal-regulated kinase 1 2
- Extracellular signal-regulated kinase 2 2
- Janus kinase 1 2
- Janus kinase 2 2
- JNK kinase 2
- Osteoclastogenesis inhibitory factor 2
- Proteins, specific or class, DNA-binding 2
- Src kinase 2
- Vimentins 2

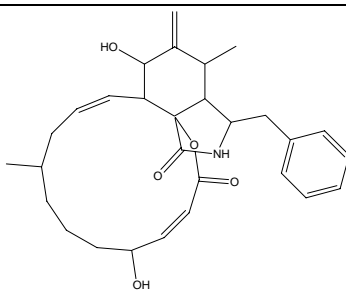

B. Cytochalasins

|                                   |       |    |       |             |    |       |
|-----------------------------------|-------|----|-------|-------------|----|-------|
| <p>NSC107658 (Cytochalasin B)</p> | k8.23 | P3 | 0.361 | 0.006211917 | NC | ≥10mg |
|-----------------------------------|-------|----|-------|-------------|----|-------|

|                                                                                                                     |        |     |                                             |                                                                         |                                |         |
|---------------------------------------------------------------------------------------------------------------------|--------|-----|---------------------------------------------|-------------------------------------------------------------------------|--------------------------------|---------|
| 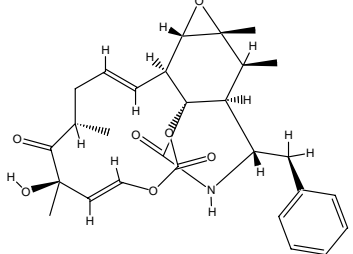 <p>NSC175151 (Cytochalasin E)</p> | k11.12 | N11 | 0.429                                       | 0.001516159                                                             | NH                             | 0-10 mg |
|  <p>NSC209835 (Cytochalasin D)</p> | k12.18 | P7  | 0.424                                       | 0.001536773                                                             | NH                             | >=10mg  |
| NSC174119                                                                                                           | k30.24 | S1  | -0.247<br>-0.176<br>0.122<br>0.009<br>0.007 | 0.065991477<br>0.190299525<br>0.38562222<br>0.947185219<br>0.957135834  | SH<br>SC<br>NH<br>NC<br>ploidy |         |
| NSC305222                                                                                                           | k2.23  | P4  | 0.325<br>0.220<br>0.218<br>0.195<br>-0.059  | 0.018840756<br>0.106077527<br>0.106433872<br>0.152665552<br>0.666710859 | NH<br>NC<br>ploidy<br>SH<br>SC |         |

Tetraploid induction in *Patinopecten yessoensis* with chemicals. Chang, Yaqing; Xiang, Jianhai; Wang, Zichen; Ding, Jun; Yang, Chuangang. Experimental Marine Biology Laboratory, Institute of Oceanology, The Chinese Academy of Sciences, Tsingtao, Peop. Rep. China. *Haiyang Yu Huzhao* (2002), 33(1), 105-112.

Induced segregation of chromosome of polyploid in *Patinopecten yessoensis* with cytochalasin B. Chang, Yaqing; Wu, Weiming; Yang, Danguang. Key Lab. of Maricultural Ecology, Agriculture Ministry PRC, Dalian Fisheries University, Dalian, Peop. Rep. China. *Dalian Shuichan Xueyuan Xuebao* (2001), 16(4), 235-240.

Effect of cytochalasin B and cycloheximide on the activation rate, chromosome constituent and in vitro development of porcine oocytes following parthenogenetic stimulation. Cha, S. K.; Kim, N. -H.; Lee, S. M.; Baik, C. S.; Lee, H. T.; Chung, K. S. Animal Resources Research Center, Kon-Kuk University, Seoul, S. Korea. *Reproduction, Fertility and Development* (1997), 9(4), 441-446.

Comments: Evidence for cytochalasin induced polyploidy

### Possible Targets from SciFinder:

Actins 31

Tubulins 15

Transport proteins 8

Monosaccharide Transport Proteins 7

Bleomycin 6

Phytohemagglutinins 6

Phosphoribosyltransferase, hypoxanthine 5

Chromosomal Proteins, Non-Histone 4

Cytochrome P 450 4

Isomerase, deoxyribonucleate topo- 4

Methionine 4

Phalloidin 4

Topoisomerase II 4

Actins, F- 3

Histones 3

Kinase (phosphorylating), protein 3

Myosins 3

Phosphoproteins, MPF (maturation-promoting factor) 3

Protein-Serine-Threonine Kinases 3

Proteins, specific or class, microtubule-assocd. 3

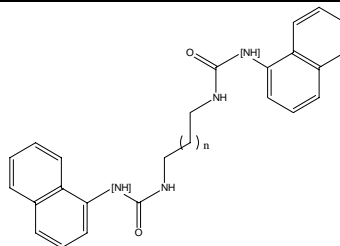

C. Bis-naphthylcarboxamides and Bis-naphthylureas

|                                                                                                     |        |     |                                               |                                                                         |                                |        |
|-----------------------------------------------------------------------------------------------------|--------|-----|-----------------------------------------------|-------------------------------------------------------------------------|--------------------------------|--------|
| 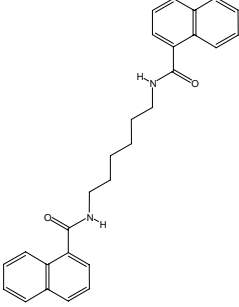 <p>NSC629737</p>  | k3.26  | P3  | 0.411<br>0.408                                | 0.004571522<br>0.006638998                                              | NC<br>NH                       | >=10mg |
|  <p>NSC629738</p>  | k5.24  | P4  | 0.400<br>0.471                                | 0.002984337<br>0.000564330                                              | NC<br>NH                       | >=10mg |
|  <p>NSC682238</p> |        |     | 0.420<br>0.348                                | 0.002154995<br>0.009813714                                              | NH<br>SH                       | >=10mg |
| NSC682234                                                                                           | k13.11 | N11 | -0.117<br>-0.091<br>-0.058<br>0.017<br>-0.006 | 0.407848955<br>0.524668736<br>0.687754723<br>0.906223627<br>0.968204154 | SC<br>NC<br>SH<br>NH<br>ploidy |        |
| NSC682237                                                                                           | k2.21  | P5  | 0.138<br>-0.100<br>0.071<br>-0.063<br>-0.031  | 0.313630356<br>0.473597359<br>0.620991182<br>0.648356759<br>0.825834042 | SC<br>NC<br>NH<br>ploidy<br>SH |        |

**Possible Targets from SciFinder:**

Selectins 2  
 Basic fibroblast growth factor 1  
 Epidermal growth factor 1  
 Epidermal growth factor receptors 1  
 Farnesyltransferase 1  
 Heregulins 1  
 Interleukin 3 1  
 Thrombopoietin 1  
 Vascular endothelial growth factor 1

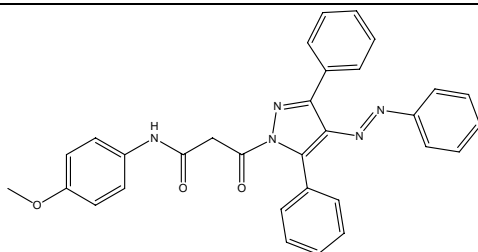

**D. Anilinomalonyl phenylazopyrazoles**

|                  |       |    |                         |                                           |                |       |
|------------------|-------|----|-------------------------|-------------------------------------------|----------------|-------|
| <p>NSC618560</p> | k1.26 | P3 | 0.457                   | 0.001798922                               | NH             | ≥10mg |
| <p>NSC637921</p> | k4.25 | P3 | 0.362<br>0.473<br>0.397 | 0.006145373<br>0.000342437<br>0.002481733 | NC<br>NH<br>SH | ≥10mg |

|                                                                                                                                      |       |     |                |                            |              |        |
|--------------------------------------------------------------------------------------------------------------------------------------|-------|-----|----------------|----------------------------|--------------|--------|
| 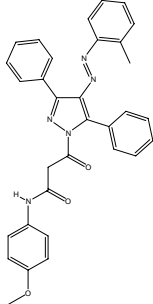 <p>NSC640673</p>                                   | k3.26 | P3  | 0.461<br>0.384 | 0.000578243<br>0.003449750 | NH<br>ploidy | >=10mg |
| Nothing known; screened for anti-HIV, antibacterial, antitubercular, fungicidal, and anticancer activities.                          |       |     |                |                            |              |        |
|  <p>E. Pyridinethione carbonitrile nucleosides</p> |       |     |                |                            |              |        |
|  <p>NSC667720</p>                                 | k12.5 | M2  | 0.360          | 0.009437213                | SH           | >=10mg |
|  <p>NSC667721</p>                                 | k7.4  | P14 | 0.467          | 0.000489459                | ploidy       | >=10mg |

|                                                                                                      |        |     |                                               |                                                                         |                                |        |
|------------------------------------------------------------------------------------------------------|--------|-----|-----------------------------------------------|-------------------------------------------------------------------------|--------------------------------|--------|
| 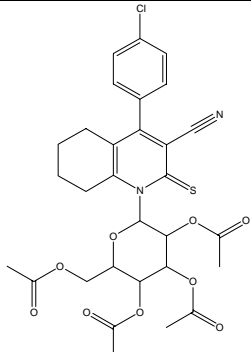 <p>NSC667529</p>   | k14.23 | P1  | 0.377                                         | 0.008927009                                                             | NH                             | >=10mg |
|  <p>NSC671813</p>   | k3.23  | P4  | 0.387                                         | 0.002965331                                                             | SC                             | >=10mg |
|  <p>NSC676600</p>  | k12.12 | N11 | 0.419<br>0.427<br>0.402<br>0.374              | 0.001610730<br>0.001758183<br>0.002615206<br>0.004901614                | NC<br>NH<br>SH<br>ploidy       | >=10mg |
|  <p>NSC712237</p> | k12.14 | P10 | 0.413                                         | 0.002106986                                                             | NC                             | >=10mg |
| NSC676444                                                                                            | k21.11 | R7  | -0.096<br>-0.081<br>0.059<br>-0.038<br>-0.024 | 0.489741768<br>0.565429033<br>0.673413856<br>0.789373863<br>0.868508183 | SC<br>SH<br>ploidy<br>NC<br>NH |        |
| NSC676594                                                                                            | k5.6   | P14 | -0.101<br>-0.049<br>-0.027<br>0.014<br>-0.005 | 0.46378849<br>0.725725359<br>0.847568049<br>0.923155721<br>0.970936516  | SC<br>NC<br>SH<br>NH<br>ploidy |        |



|           |        |     |                                                |                                                                         |                                |  |
|-----------|--------|-----|------------------------------------------------|-------------------------------------------------------------------------|--------------------------------|--|
| NSC676592 | k6.6   | P13 | -0.102<br>0.046<br>-0.032<br>-0.030<br>0.018   | 0.473905134<br>0.7439801<br>0.82603772<br>0.838833352<br>0.900656607    | NC<br>ploidy<br>SH<br>NH<br>SC |  |
| NSC676590 | k40.4  | Q1  | -0.121<br>-0.113<br>-0.096<br>-0.084<br>0.003  | 0.387167063<br>0.40849705<br>0.482220347<br>0.535128224<br>0.983284412  | NH<br>NC<br>SH<br>ploidy<br>SC |  |
| NSC671806 | k3.22  | P4  | -0.139<br>0.094<br>0.054<br>0.019<br>-0.016    | 0.324592808<br>0.516488238<br>0.704978042<br>0.891116292<br>0.911702188 | NC<br>NH<br>SH<br>ploidy<br>SC |  |
| NSC671816 | k5.14  | P11 | -0.175<br>-0.125<br>-0.120<br>-0.114<br>-0.001 | 0.218045929<br>0.390583174<br>0.399750543<br>0.421188891<br>0.992519064 | NC<br>NH<br>SH<br>ploidy<br>SC |  |
| NSC671815 | k8.3   | M2  | -0.217<br>-0.212<br>-0.104<br>0.070<br>-0.051  | 0.130663002<br>0.151637078<br>0.466721396<br>0.629551217<br>0.721355147 | NC<br>NH<br>ploidy<br>SH<br>SC |  |
| NSC671814 | k8.3   | M2  | -0.220<br>0.057<br>-0.053<br>-0.052<br>-0.005  | 0.132660045<br>0.68858217<br>0.712265875<br>0.713528918<br>0.96952374   | NH<br>ploidy<br>NC<br>SC<br>SH |  |
| NSC667716 | k7.3   | M2  | 0.221<br>0.194<br>0.148<br>-0.022<br>0.007     | 0.115695843<br>0.172479637<br>0.313788231<br>0.877707693<br>0.961871899 | ploidy<br>SH<br>NH<br>NC<br>SC |  |
| NSC699178 | k16.8  | N12 | 0.256<br>0.177<br>0.130<br>0.100<br>-0.050     | 0.078662112<br>0.234094617<br>0.401150203<br>0.509683831<br>0.7334576   | ploidy<br>SH<br>NH<br>NC<br>SC |  |
| NSC671807 | k3.22  | P4  | 0.261<br>0.180<br>0.182<br>0.150<br>0.080      | 0.06154483<br>0.198341583<br>0.206104782<br>0.288920623<br>0.570348516  | NC<br>ploidy<br>NH<br>SH<br>SC |  |
| NSC667545 | k35.22 | S4  | -0.296<br>-0.297<br>-0.251<br>-0.123<br>-0.117 | 0.025178577<br>0.026063618<br>0.070210517<br>0.362393328<br>0.391535167 | SC<br>NC<br>NH<br>ploidy<br>SH |  |
| NSC667719 | k6.3   | P14 | 0.309<br>0.281<br>0.263<br>0.254<br>0.206      | 0.027207966<br>0.053134136<br>0.061918423<br>0.069771469<br>0.142780894 | SH<br>NH<br>NC<br>ploidy<br>SC |  |

|                                                                                                                                                                                                                                                                                                                                                                                       |        |     |                                                |                                                                         |                                |         |
|---------------------------------------------------------------------------------------------------------------------------------------------------------------------------------------------------------------------------------------------------------------------------------------------------------------------------------------------------------------------------------------|--------|-----|------------------------------------------------|-------------------------------------------------------------------------|--------------------------------|---------|
|                                                                                                                                                                                                                                                                                                                                                                                       |        |     | -0.403<br>-0.256<br>-0.223<br>-0.206<br>-0.155 | 0.002497369<br>0.069303512<br>0.104433523<br>0.131112443<br>0.257734453 | NC<br>NH<br>SH<br>ploidy<br>SC |         |
| NSC676591                                                                                                                                                                                                                                                                                                                                                                             | k36.7  | Q3  |                                                |                                                                         |                                |         |
| <p><b>P-glycoprotein</b> substrates and antagonists cluster into two distinct groups. Scala, Stefania; Akhmed, Nadia; Rao, U. S.; Paull, Ken; Lan, Lu-Bin; Dickstein, Bruce; Lee, Jong-Seok; Elgemeie, Galal H.; Stein, Wilfred D.; Bates, Susan E. National Cancer Inst., National Institutes Health, Bethesda, MD, USA. <i>Molecular Pharmacology</i> (1997), 51(6), 1024-1033.</p> |        |     |                                                |                                                                         |                                |         |
| 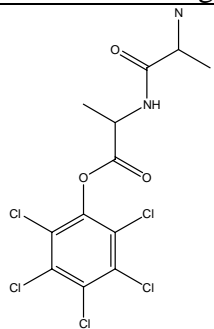                                                                                                                                                                                                                                                                                                     |        |     |                                                |                                                                         |                                |         |
| F. Pentachlorophenyl polypeptide esters                                                                                                                                                                                                                                                                                                                                               |        |     |                                                |                                                                         |                                |         |
|  <p>NSC668884</p>                                                                                                                                                                                                                                                                                   | k13.14 | P10 | 0.350                                          | 0.008742078                                                             | NC                             | >=10mg  |
|  <p>NSC668885</p>                                                                                                                                                                                                                                                                                  | k13.14 | P10 | 0.443                                          | 0.000783028                                                             | NC                             | 0-10 mg |
|  <p>NSC668888</p>                                                                                                                                                                                                                                                                                  | k13.14 | P10 | 0.440                                          | 0.000766654                                                             | NC                             | 0-10 mg |
| NSC668871                                                                                                                                                                                                                                                                                                                                                                             | k18.15 | P9  | 0.106<br>0.084                                 | 0.476633963<br>0.58083281                                               | SH<br>NC                       |         |

|                                                                                                                                                                                                                                                                                                                                                                                                                                                           |       |    |                                           |                                                                        |                                |        |
|-----------------------------------------------------------------------------------------------------------------------------------------------------------------------------------------------------------------------------------------------------------------------------------------------------------------------------------------------------------------------------------------------------------------------------------------------------------|-------|----|-------------------------------------------|------------------------------------------------------------------------|--------------------------------|--------|
|                                                                                                                                                                                                                                                                                                                                                                                                                                                           |       |    | -0.031<br>0.015<br>0.001                  | 0.843851676<br>0.918136137<br>0.992954166                              | NH<br>SC<br>ploidy             |        |
| <p>Identification of <b>epidermal growth factor receptor and c-erbB2 pathway inhibitors</b> by correlation with gene expression patterns. Wosikowski, Katja; Schuurhuis, Danita; Johnson, Kathryn; Paull, Kenneth D.; Myers, Timothy G.; Weinstein, John N.; Bates, Susan E. Division of Clinical Sciences, Medicine Branch, National Cancer Institute, Bethesda, MD, USA. <i>Journal of the National Cancer Institute</i> (1997), 89(20), 1505-1515.</p> |       |    |                                           |                                                                        |                                |        |
| 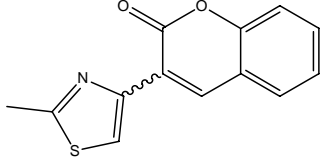 <p>G. Thiazolyl coumarins</p>                                                                                                                                                                                                                                                                                                                                           |       |    |                                           |                                                                        |                                |        |
| <br>NSC675801                                                                                                                                                                                                                                                                                                                                                            | k7.25 | P3 | 0.417                                     | 0.003161139                                                            | NH                             | >=10mg |
| <br>NSC684983                                                                                                                                                                                                                                                                                                                                                           | k1.26 | P3 | 0.353                                     | 0.009562997                                                            | SH                             | >=10mg |
| <br>NSC684985                                                                                                                                                                                                                                                                                                                                                          | k1.26 | P3 | 0.408<br>0.497<br>0.416<br>0.360          | 0.002405138<br>0.000243637<br>0.001963391<br>0.007443764               | NC<br>NH<br>SH<br>ploidy       | >=10mg |
| <b>NSC684982</b>                                                                                                                                                                                                                                                                                                                                                                                                                                          | k1.26 | P3 | 0.324<br>0.256<br>0.228<br>0.146<br>0.041 | 0.021769351<br>0.064704616<br>0.100512091<br>0.293329242<br>0.77101654 | NH<br>NC<br>SH<br>ploidy<br>SC |        |

Priepke, Henning; Kauffmann-Hefner, Iris; Huel, Norbert; Damm, Klaus; Schnapp, Andreas. Preparation of thiazols and related compounds as **telomerase** inhibitors. PCT Int. Appl. (2003), 88 pp.

**Possible Targets from SciFinder:**

Vascular endothelial growth factor receptors 1  
Tumor necrosis factors 2  
Transcription factors 1  
Tissue plasminogen activator 1  
Telomerase 1  
Tautomerase 1  
Tachykinin receptors 1  
Surfactin 1  
Stromelysin 1  
Protein Rob (right origin-binding) (Escherichia gene rob) (9CI) 1  
Protein (Escherichia coli gene marA) 1  
Prostanoid receptors 1  
Potassium channel 1  
Neutrophil inhibitory factor 1  
MPL receptor 1  
MMP 9 1  
MMP 2 1  
Macrophage migration inhibitory factor 1  
Glycogen synthase kinase 3b 1  
Glycogen synthase kinase 3 1  
fructose-1,6-bisphosphatase 1  
Cytokines 1  
COX 2 1  
Corticotropin-releasing factor 1  
Collagenase 1  
Cdk5 kinase 1  
Cdk2-cyclin A kinase 1  
Cdk2 kinase 1  
CDK kinase 1  
Acetylcholinesterase 1

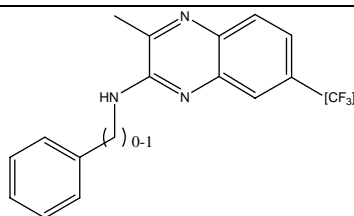

H. Anilino/phenoxy-carboxy/phenyl-6(7)-substituted quinoxalines

|                                                                                                      |       |    |                         |                                           |                    |        |
|------------------------------------------------------------------------------------------------------|-------|----|-------------------------|-------------------------------------------|--------------------|--------|
| 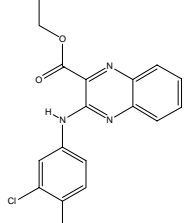 <p>NSC670679</p>   | k3.26 | P3 | 0.420                   | 0.004098672                               | NH                 | >=10mg |
|  <p>NSC680551</p>   | k2.25 | P3 | 0.509<br>0.625<br>0.427 | 0.000073781<br>0.000000743<br>0.001027316 | NC<br>NH<br>ploidy | >=10mg |
|  <p>NSC695320</p>  | k1.26 | P3 | 0.465<br>0.441          | 0.000660031<br>0.001902125                | NC<br>NH           | >=10mg |
|  <p>NSC675774</p> | k2.23 | P4 | 0.374                   | 0.008112850                               | NH                 | >=10mg |
|  <p>NSC631581</p> | k1.16 | P6 | 0.520<br>0.557<br>0.462 | 0.000247442<br>0.000106294<br>0.001221062 | NC<br>NH<br>ploidy | >=10mg |
|  <p>NSC637404</p> | k9.23 | P3 | 0.443                   | 0.000629496                               | NC                 | >=10mg |

|                                                                                                      |        |     |                                              |                                                                         |                                |        |
|------------------------------------------------------------------------------------------------------|--------|-----|----------------------------------------------|-------------------------------------------------------------------------|--------------------------------|--------|
| 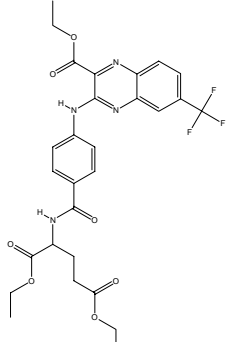 <p>NSC672883</p>   | k14.13 | P10 | 0.430                                        | 0.002578995                                                             | NC                             | >=10mg |
|  <p>NSC680552</p>   | k24.26 | R3  | 0.362                                        | 0.008449114                                                             | NH                             | >=10mg |
|  <p>NSC688812</p>  | k3.26  | P3  | 0.374                                        | 0.005837177                                                             | SH                             | >=10mg |
|  <p>NSC688818</p> | k2.17  | P6  | 0.380                                        | 0.008330029                                                             | NH                             | >=10mg |
| NSC683068                                                                                            | k25.22 | R3  | -0.094<br>0.066<br>-0.058<br>0.032<br>-0.022 | 0.504362551<br>0.650999625<br>0.681939954<br>0.82034482<br>0.877902111  | SC<br>NH<br>ploidy<br>SH<br>NC |        |
| NSC688822                                                                                            | k29.26 | S1  | -0.123<br>0.113<br>0.047<br>0.037<br>0.011   | 0.396315259<br>0.432686636<br>0.753182592<br>0.798237305<br>0.939504818 | SC<br>ploidy<br>NH<br>NC<br>SH |        |
| NSC677091                                                                                            | k5.17  | P6  | -0.158<br>0.051                              | 0.272837097<br>0.733096489                                              | SH<br>NH                       |        |

|           |        |     |                                                  |                                                                         |                                |  |
|-----------|--------|-----|--------------------------------------------------|-------------------------------------------------------------------------|--------------------------------|--|
|           |        |     | -0.030<br>0.023<br>0.003                         | 0.833130824<br>0.872917211<br>0.984487767                               | SC<br>ploidy<br>NC             |  |
| NSC642076 | k10.18 | P7  | 0.169<br>0.170<br>-0.122<br>0.109<br>0.091       | 0.284108663<br>0.30020659<br>0.434736934<br>0.485439698<br>0.561871781  | NC<br>NH<br>SC<br>ploidy<br>SH |  |
| NSC688819 | k26.26 | S1  | 0.176<br>0.118<br>-0.109<br>0.030<br>0.018       | 0.221515623<br>0.419182165<br>0.449304777<br>0.842812147<br>0.904331188 | ploidy<br>SH<br>SC<br>NH<br>NC |  |
| NSC682363 | k27.16 | R8  | -0.194<br>0.076<br>-0.014<br>-0.013<br>-0.011    | 0.173301342<br>0.583525058<br>0.921508015<br>0.927481197<br>0.942760567 | ploidy<br>SC<br>SH<br>NC<br>NH |  |
| NSC670678 | k1.26  | P3  | 0.220<br>0.217<br>0.105<br>0.048<br>0.042        | 0.102541278<br>0.111475644<br>0.43960117<br>0.725737975<br>0.769700358  | SC<br>NC<br>ploidy<br>SH<br>NH |  |
| NSC677090 | k26.20 | R5  | -0.221<br>-0.158<br>-0.160<br>-0.097<br>0.031    | 0.131345265<br>0.278960271<br>0.29372471<br>0.510816167<br>0.830959256  | SH<br>SC<br>NH<br>NC<br>ploidy |  |
| NSC683067 | k1.26  | P3  | 0.234<br>0.221<br>0.142<br>0.054<br>0.037        | 0.095107496<br>0.127687614<br>0.309704254<br>0.699234873<br>0.796706785 | NC<br>NH<br>ploidy<br>SC<br>SH |  |
| NSC688820 |        |     | 0.245<br>0.116<br>0.089<br>0.070<br>0.041        | 0.089827488<br>0.437257571<br>0.542549383<br>0.627431351<br>0.778702866 | NC<br>NH<br>SH<br>ploidy<br>SC |  |
| NSC685511 | k17.15 | P10 | -0.253<br>-0.179<br>-0.147<br>0.138<br>0.045     | 0.069793228<br>0.200898691<br>0.298578571<br>0.325395816<br>0.758836449 | SH<br>ploidy<br>NC<br>SC<br>NH |  |
| NSC715126 | k25.1  | N3  | -0.260<br>-0.129<br>-0.124<br>-0.065<br>4.06E-04 | 0.052566989<br>0.362546911<br>0.366965354<br>0.638127794<br>0.99762836  | ploidy<br>NH<br>SH<br>NC<br>SC |  |
| NSC677089 | k25.21 | R3  | -0.324<br>-0.229<br>-0.221<br>-0.220<br>-0.088   | 0.029837123<br>0.117613542<br>0.126175904<br>0.133503948<br>0.547608698 | NH<br>NC<br>ploidy<br>SH<br>SC |  |
| NSC680187 | k1.26  | P3  | 0.340<br>0.284                                   | 0.015781781<br>0.045314522                                              | NC<br>SH                       |  |

|  |  |  |       |             |        |  |
|--|--|--|-------|-------------|--------|--|
|  |  |  | 0.272 | 0.053611351 | ploidy |  |
|  |  |  | 0.227 | 0.109099042 | SC     |  |
|  |  |  | 0.227 | 0.124068413 | NH     |  |

**Possible SciFinder Targets:**

Receptor tyrosine kinase 1  
 Protein tyrosine kinase 1  
 Platelet-derived growth factor receptors 2  
 neu (receptor) 2  
 Muscarinic receptors 1  
 Interleukin 8 receptors 3  
 Integrase 1  
 HER2 kinase 1  
 Growth factor receptors 1  
 Glucagon 1  
 G protein-coupled receptors 2  
 Epidermal growth factor receptors 2  
 EGF receptor tyrosine kinase 2  
 EGF 1  
 Dopamine receptors 2  
 Dihydropteroate synthase 1  
 Chemokines 1  
 Chemokine receptors 2  
 Cadherins 3  
 Cadherin E (rat fragment) 1  
 5-Lipoxygenase 1  
 5-HT receptors 1  
 15-Lipoxygenase 1

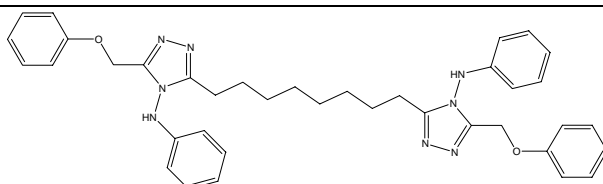

I. 1,8-Bis(5-aryloxymethyl-4-anilino-1,2,4-triazol-2-yl)octanes

|                  |        |    |       |             |    |        |
|------------------|--------|----|-------|-------------|----|--------|
| <p>NSC697167</p> | k34.20 | S6 | 0.363 | 0.008206765 | SH | >=10mg |
|------------------|--------|----|-------|-------------|----|--------|



|                                                                                                                                                     |        |    |                                            |                                                                         |                                |        |
|-----------------------------------------------------------------------------------------------------------------------------------------------------|--------|----|--------------------------------------------|-------------------------------------------------------------------------|--------------------------------|--------|
| 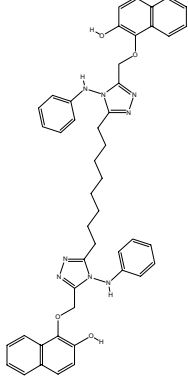 <p>NSC697168</p>                                                  | k34.20 | S6 | 0.358                                      | 0.008432114                                                             | ploidy                         | >=10mg |
|  <p>NSC697169</p>                                                 | k34.20 | S6 | 0.387                                      | 0.004596624                                                             | SH                             | >=10mg |
| NSC697166                                                                                                                                           | k33.21 | S6 | 0.300<br>0.260<br>-0.167<br>0.125<br>0.035 | 0.027512456<br>0.059903644<br>0.228173457<br>0.372970265<br>0.803201446 | ploidy<br>SH<br>SC<br>NC<br>NH |        |
| NSC697165                                                                                                                                           | k34.20 | S6 | 0.348<br>0.323<br>0.115<br>-0.109<br>0.036 | 0.010762846<br>0.017266302<br>0.412721925<br>0.430652466<br>0.799181568 | SH<br>ploidy<br>NC<br>SC<br>NH |        |
| Not much known.                                                                                                                                     |        |    |                                            |                                                                         |                                |        |
|  <p>J. 3-Alkylidene-5,5-disubstituted tetrahydro-2-furanones</p> |        |    |                                            |                                                                         |                                |        |

|                                                                                                        |       |     |                                               |                                                                         |                                |         |
|--------------------------------------------------------------------------------------------------------|-------|-----|-----------------------------------------------|-------------------------------------------------------------------------|--------------------------------|---------|
| 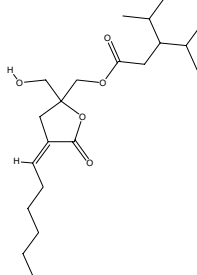<br><b>NSC703747</b>  | k6.9  | P13 | 0.382                                         | 0.004741423                                                             | ploidy                         | 0-10 mg |
| <br><b>NSC703748</b>  | k6.9  | P13 | 0.438                                         | 0.001149868                                                             | NC                             | 0-10 mg |
| <br><b>NSC703753</b>  | k6.9  | P13 | 0.428<br>0.427                                | 0.001534064<br>0.001448104                                              | NC<br>ploidy                   | 0-10 mg |
| <br><b>NSC703756</b> | k3.15 | P11 | 0.403                                         | 0.002535327                                                             | SC                             | 0-10 mg |
| NSC703760                                                                                              | k1.21 | P5  | -0.082<br>0.038<br>-0.023<br>0.006<br>0.002   | 0.556307679<br>0.785422189<br>0.870440897<br>0.964358508<br>0.987721774 | SH<br>NC<br>NH<br>SC<br>ploidy |         |
| NSC722219                                                                                              | k6.9  | P13 | 0.164<br>-0.100<br>0.024<br>0.014<br>-0.005   | 0.24445864<br>0.462461762<br>0.862793076<br>0.919021164<br>0.973733665  | NH<br>SC<br>NC<br>ploidy<br>SH |         |
| NSC714071                                                                                              | k6.9  | P13 | -0.185<br>0.155<br>-0.116<br>-0.045<br>-0.039 | 0.203827949<br>0.304292151<br>0.433006449<br>0.763704078<br>0.787932501 | SC<br>NH<br>NC<br>SH<br>ploidy |         |
| NSC703750                                                                                              | k6.9  | P13 | -0.186<br>0.071<br>0.068<br>-0.038            | 0.170432422<br>0.605427893<br>0.632520287<br>0.781310152                | SC<br>ploidy<br>NH<br>SH       |         |

|                               |        |     |                                                |                                                                         |                                |  |
|-------------------------------|--------|-----|------------------------------------------------|-------------------------------------------------------------------------|--------------------------------|--|
|                               |        |     | 0.020                                          | 0.882571163                                                             | NC                             |  |
| NSC703749                     | k6.9   | P13 | -0.187<br>0.179<br>0.168<br>0.160<br>0.026     | 0.168088748<br>0.186311017<br>0.234280191<br>0.242941331<br>0.851163859 | SC<br>ploidy<br>NH<br>NC<br>SH |  |
| NSC703758                     | k11.10 | N11 | 0.192<br>0.184<br>0.139<br>0.118<br>0.075      | 0.180854304<br>0.191147649<br>0.324953122<br>0.399125622<br>0.595304043 | NH<br>NC<br>SH<br>ploidy<br>SC |  |
| NSC703762                     | k6.9   | P13 | 0.215<br>-0.184<br>0.124<br>0.120<br>0.110     | 0.114126869<br>0.178061164<br>0.370269798<br>0.397969059<br>0.429784    | ploidy<br>SC<br>NC<br>NH<br>SH |  |
| NSC703761                     | k6.9   | P13 | 0.217<br>-0.177<br>0.134<br>0.104<br>0.076     | 0.107370598<br>0.191188077<br>0.344405642<br>0.449940718<br>0.578871028 | ploidy<br>SC<br>NH<br>NC<br>SH |  |
| NSC703759                     | k1.21  | P5  | 0.222<br>0.112<br>0.076<br>0.022<br>0.018      | 0.106231252<br>0.415922469<br>0.590692762<br>0.87250262<br>0.89561      | NC<br>ploidy<br>NH<br>SC<br>SH |  |
| NSC703751                     | k6.9   | P13 | -0.256<br>0.208<br>-0.126<br>0.121<br>0.051    | 0.056583223<br>0.123836825<br>0.361202521<br>0.393599531<br>0.712085534 | SC<br>ploidy<br>SH<br>NH<br>NC |  |
| NSC703754                     | k10.9  | N10 | 0.292<br>0.233<br>0.166<br>0.137<br>0.087      | 0.03777303<br>0.106639387<br>0.245430903<br>0.334290244<br>0.538110806  | NC<br>NH<br>SH<br>ploidy<br>SC |  |
| NSC703757                     | k11.10 | N11 | 0.300<br>0.237<br>0.199<br>0.187<br>0.003      | 0.028853798<br>0.084899537<br>0.15250509<br>0.187776278<br>0.984847054  | NC<br>ploidy<br>SH<br>NH<br>SC |  |
| NSC703746                     | k38.18 | S5  | -0.373<br>-0.248<br>-0.238<br>-0.171<br>-0.065 | 0.005479218<br>0.079616508<br>0.086775274<br>0.221930153<br>0.640481396 | SC<br>NH<br>NC<br>SH<br>ploidy |  |
| Thought to be PKC inhibitors. |        |     |                                                |                                                                         |                                |  |

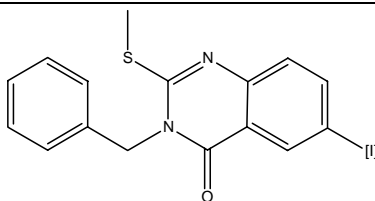

K. 2-Substituted mercapto-3H-quinazolines

|                  |        |     |                |                            |          |         |
|------------------|--------|-----|----------------|----------------------------|----------|---------|
| <p>NSC715714</p> | k11.24 | P2  | 0.404          | 0.002945839                | NH       | >=10mg  |
| <p>NSC715719</p> | k2.25  | P3  | 0.388<br>0.437 | 0.004433611<br>0.001677055 | NC<br>NH | >=10mg  |
| <p>NSC715722</p> | k4.12  | P12 | 0.364          | 0.008022135                | NH       | >=10mg  |
| <p>NSC715727</p> | k5.23  | P4  | 0.418          | 0.001503304                | NC       | 0-10 mg |
| <p>NSC715742</p> | k3.26  | P3  | 0.367          | 0.007986692                | NH       | >=10mg  |

|                                                                                                       |        |    |                                                 |                                                                         |                                |         |
|-------------------------------------------------------------------------------------------------------|--------|----|-------------------------------------------------|-------------------------------------------------------------------------|--------------------------------|---------|
| 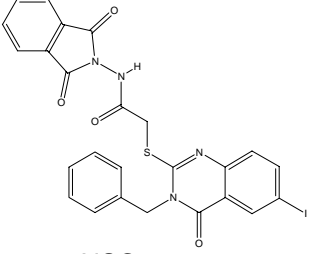<br><b>NSC715748</b> | k5.24  | P4 | 0.414<br>0.505<br>0.402                         | 0.001697600<br>0.000115223<br>0.002372141                               | NC<br>NH<br>SH                 | 0-10 mg |
| <br><b>NSC718644</b> | k9.24  | P3 | 0.414<br>0.458                                  | 0.002558976<br>0.000735468                                              | NC<br>SH                       | >=10mg  |
| NSC715743                                                                                             | k17.16 | P9 | -0.076<br>0.072<br>-0.052<br>-0.028<br>7.62E-04 | 0.583337219<br>0.605382726<br>0.716471698<br>0.843254333<br>0.99559217  | ploidy<br>SH<br>NH<br>NC<br>SC |         |
| NSC715735                                                                                             | k26.23 | R3 | -0.091<br>-0.066<br>0.056<br>-0.053<br>0.006    | 0.523047422<br>0.652214884<br>0.690772578<br>0.711315357<br>0.965066083 | SH<br>NH<br>SC<br>ploidy<br>NC |         |
| NSC715724                                                                                             | k2.20  | P5 | 0.120<br>-0.082<br>-0.059<br>-0.053<br>0.003    | 0.391186247<br>0.563782519<br>0.676230617<br>0.707516352<br>0.984385242 | SC<br>SH<br>NC<br>ploidy<br>NH |         |
| NSC715737                                                                                             | k15.15 | P9 | -0.138<br>0.084<br>-0.032<br>0.029<br>-2.41E-05 | 0.323152629<br>0.566448042<br>0.820053229<br>0.839342221<br>0.999864496 | SC<br>NH<br>SH<br>NC<br>ploidy |         |
| NSC715715                                                                                             | k22.1  | N3 | -0.175<br>-0.132<br>-0.061<br>0.027<br>0.022    | 0.200904895<br>0.332160953<br>0.656058364<br>0.849153765<br>0.874251191 | NC<br>SC<br>ploidy<br>NH<br>SH |         |
| NSC715729                                                                                             | k15.19 | P9 | 0.176<br>-0.103<br>-0.082<br>0.014<br>0.011     | 0.208349882<br>0.443930706<br>0.545812945<br>0.919562725<br>0.937931298 | NH<br>SC<br>SH<br>ploidy<br>NC |         |
| NSC715726                                                                                             | k25.12 | R9 | -0.179<br>-0.106<br>-0.064<br>0.039             | 0.185844819<br>0.440986603<br>0.644837787<br>0.776241654                | SC<br>SH<br>NC<br>ploidy       |         |

|           |        |     |                                                |                                                                         |                                |  |
|-----------|--------|-----|------------------------------------------------|-------------------------------------------------------------------------|--------------------------------|--|
|           |        |     | -0.036                                         | 0.802132195                                                             | NH                             |  |
| NSC715746 | k5.12  | P12 | -0.194<br>0.167<br>-0.060<br>0.003<br>0.002    | 0.151329542<br>0.236055075<br>0.662271983<br>0.980924209<br>0.990201041 | SC<br>NH<br>ploidy<br>NC<br>SH |  |
| NSC715744 | k3.17  | P6  | 0.200<br>-0.153<br>-0.114<br>0.053<br>-0.022   | 0.152089628<br>0.257051795<br>0.39800365<br>0.698769411<br>0.874969692  | NH<br>ploidy<br>SC<br>NC<br>SH |  |
| NSC715718 | k4.12  | P12 | 0.201<br>0.194<br>0.187<br>0.094<br>-0.006     | 0.149293379<br>0.182571719<br>0.184231544<br>0.507563089<br>0.968472668 | SC<br>NH<br>NC<br>SH<br>ploidy |  |
| NSC715713 | k23.19 | R6  | -0.233<br>-0.147<br>-0.097<br>-0.093<br>0.027  | 0.081389877<br>0.280680443<br>0.475576839<br>0.506437565<br>0.844215383 | SC<br>SH<br>NC<br>NH<br>ploidy |  |
| NSC715733 | k4.11  | P12 | 0.242<br>-0.162<br>0.063<br>0.011<br>-0.007    | 0.083841199<br>0.232230502<br>0.646662145<br>0.935975896<br>0.956716779 | NH<br>SC<br>ploidy<br>NC<br>SH |  |
| NSC715710 | k24.2  | N3  | -0.243<br>-0.219<br>-0.212<br>-0.177<br>0.096  | 0.07063919<br>0.110062808<br>0.116725082<br>0.195141061<br>0.500071481  | ploidy<br>SH<br>SC<br>NC<br>NH |  |
| NSC715745 | k24.1  | N3  | -0.249<br>-0.217<br>-0.180<br>-0.142<br>-0.100 | 0.064375917<br>0.112325142<br>0.188728527<br>0.296464841<br>0.480408718 | SC<br>SH<br>NC<br>ploidy<br>NH |  |
| NSC715711 | k23.19 | R6  | -0.270<br>-0.264<br>-0.230<br>-0.194<br>-0.046 | 0.043928036<br>0.04920573<br>0.084949343<br>0.147185222<br>0.741998432  | NC<br>SH<br>SC<br>ploidy<br>NH |  |
| NSC715716 | k22.5  | N5  | -0.276<br>-0.171<br>-0.150<br>-0.119<br>-0.106 | 0.039417196<br>0.20660923<br>0.266028732<br>0.397100062<br>0.430622786  | NC<br>SH<br>ploidy<br>NH<br>SC |  |
| NSC715740 | k4.25  | P3  | 0.348<br>0.274<br>0.264<br>0.197<br>0.107      | 0.012226223<br>0.044884634<br>0.053872646<br>0.153842311<br>0.434899855 | NH<br>NC<br>SH<br>ploidy<br>SC |  |

Synthesis and evaluation of substituted quinazolone derivatives for antibacterial, antifungal, and antiacetylcholinesterase activities. Gupta, Anil K. Sen; Misra, Hemant K. Dep. Chem., Univ. Lucknow, Lucknow, India. Journal of Pharmaceutical Sciences (1980), 69(11), 1313-17.

Antitumor Activity of a **Kinesin** Inhibitor. Sakowicz, Roman; Finer, Jeffrey T.; Beraud, Christophe; Crompton, Anne; Lewis, Evan; Fritsch, Alex; Lee, Yan; Mak, John; Moody, Robert; Turincio, Rebecca; Chabala, John C.; Gonzales, Paul; Roth, Stephanie; Weitman, Steve; Wood, Kenneth W. Institute for Drug Development, Cancer Therapy and Research Center, San Antonio, TX, USA. Cancer Research (2004), 64(9), 3276-3280.

**Possible SciFinder Targets:**

Angiotensin II 36  
Angiotensin receptors 13  
Angiotensin receptors, angiotensin II 10  
Kinesins 8  
Angiotensin receptors, angiotensin II AT1 7  
Angiotensin receptors, angiotensin II AT2 7  
Saralasin 6  
Enalapril 5  
Mineralocorticoid receptors 5  
MMP-13 5  
Saralasin acetate 5  
Sarmesin 5  
CGP42112A 4  
Lisinopril 4  
Carboxypeptidase, dipeptidyl 3  
Endothelin receptors 3  
Histone deacetylase 3  
MMP 7 3  
MMP 9 3  
MMP-14 3  
MMP-3 3  
MMP-8 3

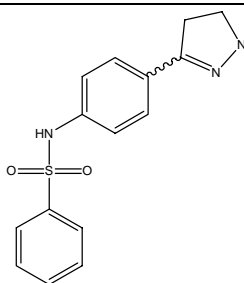

L. N-(p-(substituted azole)phenyl) benzenesulfonamides

|                                                                                                      |        |     |                            |                                           |                    |        |
|------------------------------------------------------------------------------------------------------|--------|-----|----------------------------|-------------------------------------------|--------------------|--------|
| 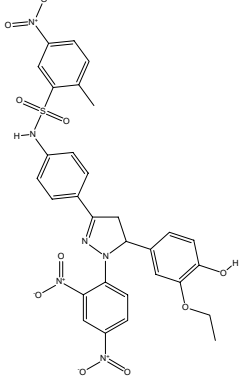 <p>NSC716281</p>   | k1.24  | P4  | 0.355                      | 0.009034090                               | SC                 | >=10mg |
|  <p>NSC716284</p>   | k23.25 | R1  | 0.365                      | 0.007271075                               | NC                 | >=10mg |
|  <p>NSC716945</p>  | k25.26 | R3  | 0.369                      | 0.007158525                               | SH                 | >=10mg |
|  <p>NSC719178</p> | k1.9   | P13 | 0.434                      | 0.001652445                               | SC                 | >=10mg |
| NSC716288                                                                                            | k24.25 | R3  | -0.109<br>-0.030<br>-0.026 | 0.430961175<br>0.826885973<br>0.850023942 | NC<br>ploidy<br>SH |        |



|           |        |    |                                                |                                                                         |                                |  |
|-----------|--------|----|------------------------------------------------|-------------------------------------------------------------------------|--------------------------------|--|
|           |        |    | -0.008<br>0.006                                | 0.953689128<br>0.966881356                                              | NH<br>SC                       |  |
| NSC716280 | k25.12 | R9 | 0.111<br>0.069<br>-0.052<br>0.045<br>0.034     | 0.431895953<br>0.624916082<br>0.710259141<br>0.733663804<br>0.808703833 | NC<br>SH<br>SC<br>NH<br>ploidy |  |
| NSC716286 | k15.15 | P9 | 0.112<br>-0.055<br>0.050<br>0.041<br>0.002     | 0.427848444<br>0.687782981<br>0.716093529<br>0.762553263<br>0.986187192 | NH<br>SC<br>SH<br>ploidy<br>NC |  |
| NSC716279 | k23.18 | R6 | -0.137<br>0.097<br>0.053<br>0.040<br>-0.014    | 0.328472271<br>0.506690313<br>0.708771421<br>0.776877613<br>0.923353612 | SC<br>NH<br>ploidy<br>NC<br>SH |  |
| NSC716289 | k17.16 | P9 | 0.150<br>0.065<br>0.027<br>0.014<br>-0.007     | 0.273967396<br>0.637609555<br>0.848710862<br>0.919054697<br>0.958882008 | SC<br>ploidy<br>SH<br>NC<br>NH |  |
| NSC716275 | k5.17  | P6 | -0.158<br>-0.122<br>-0.121<br>-0.114<br>0.073  | 0.250467183<br>0.372958486<br>0.381505125<br>0.413239313<br>0.611752251 | SC<br>ploidy<br>NC<br>SH<br>NH |  |
| NSC716291 | k23.18 | R6 | 0.160<br>-0.143<br>0.119<br>0.092<br>-0.072    | 0.2924549<br>0.325726627<br>0.414511019<br>0.533750858<br>0.62796868    | NH<br>SC<br>ploidy<br>NC<br>SH |  |
| NSC716276 | k26.13 | R8 | -0.187<br>-0.110<br>-0.100<br>-0.079<br>-0.053 | 0.175431065<br>0.433606221<br>0.476998396<br>0.568947789<br>0.713372663 | SC<br>SH<br>NC<br>ploidy<br>NH |  |
| NSC716285 | k12.25 | P2 | 0.188<br>0.188<br>0.160<br>-0.143<br>0.027     | 0.176771163<br>0.191189916<br>0.246891769<br>0.30273672<br>0.847558634  | NC<br>NH<br>ploidy<br>SC<br>SH |  |
| NSC716274 | k25.26 | R3 | 0.192<br>-0.140<br>-0.064<br>-0.038<br>0.014   | 0.164882436<br>0.310968543<br>0.653087515<br>0.787150443<br>0.919606761 | ploidy<br>SC<br>NH<br>NC<br>SH |  |
| NSC716277 | k24.18 | R6 | -0.202<br>-0.147<br>-0.085<br>-0.047<br>-0.002 | 0.168196287<br>0.323286131<br>0.568255965<br>0.75280639<br>0.990794921  | SC<br>SH<br>NC<br>ploidy<br>NH |  |
| NSC716278 |        |    | 0.217<br>0.188<br>0.132                        | 0.122505322<br>0.181752061<br>0.346222949                               | NC<br>SH<br>SC                 |  |

|           |        |     |                                             |                                                                         |                                |  |
|-----------|--------|-----|---------------------------------------------|-------------------------------------------------------------------------|--------------------------------|--|
|           |        |     | 0.079<br>0.007                              | 0.573791046<br>0.96035458                                               | ploidy<br>NH                   |  |
| NSC716283 | k16.18 | P9  | -0.222<br>0.100<br>0.066<br>-0.046<br>0.039 | 0.109864685<br>0.472536951<br>0.649225983<br>0.741135301<br>0.779090333 | SH<br>ploidy<br>NH<br>SC<br>NC |  |
| NSC716282 | k23.25 | R1  | 0.332<br>0.329<br>0.267<br>0.120<br>0.012   | 0.015163037<br>0.015294345<br>0.060818203<br>0.392856808<br>0.931128289 | NC<br>ploidy<br>NH<br>SH<br>SC |  |
| NSC716290 | k8.12  | P11 | 0.334<br>0.325<br>0.258<br>0.104<br>-0.079  | 0.014445967<br>0.018697268<br>0.07400365<br>0.461010337<br>0.576130443  | ploidy<br>NC<br>NH<br>SH<br>SC |  |

Thought to be antimicrobial agents

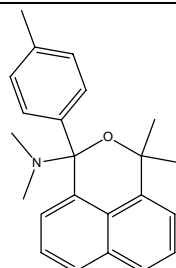

M. 1,1-Dimethyl-3-phenyl-3-pyrrolidinyl/4-morpholinyl naphthalans

|                  |        |     |                |                            |          |        |
|------------------|--------|-----|----------------|----------------------------|----------|--------|
| <p>NSC718588</p> | k13.14 | P10 | 0.415<br>0.380 | 0.002014361<br>0.006444423 | NC<br>NH | >=10mg |
| <p>NSC718589</p> | k14.13 | P10 | 0.374          | 0.005829978                | NC       | >=10mg |

Inhibitor Specificity via Protein Dynamics Insights from the Design of Antibacterial Agents Targeted Against **Thymidylate Synthase**. Ferrari, Stefania; Costi, Paola M.; Wade, Rebecca C. Dipartimento di Scienze Farmaceutiche, Università di Modena e Reggio Emilia, Modena, Italy. Chemistry & Biology (2003), 10(12), 1183-1193.

Loosely related substructure thought to be Thymidylate Synthase inhibitors.
